# Supplementary material for: The Solution Behavior of Dopamine in the Presence of Mono and Divalent Cations: A Thermodynamic Investigation in Different Experimental Conditions
Source: MDPI journal article supplement (doi:10.3390/biom11091312), 2021-09-05
Supplement: s1 [file s1]

# Supplementary Materials

**Table S1.** Literature protonation constants of dopamine at different ionic strengths and temperatures in NaCl aqueous solutions.

| $I/\text{mol dm}^{-3}$ | $\log K_1^{\text{H a)}}$ | $I/\text{mol dm}^{-3}$ | $\log K_2^{\text{H a)}}$ | $I/\text{mol dm}^{-3}$ | $\log K_1^{\text{H a)}}$ | $I/\text{mol dm}^{-3}$ | $\log K_2^{\text{H a)}}$ |
|------------------------|--------------------------|------------------------|--------------------------|------------------------|--------------------------|------------------------|--------------------------|
| $T = 288.15 \text{ K}$ |                          |                        |                          | $T = 298.15 \text{ K}$ |                          |                        |                          |
| 0.147                  | 10.687                   | 0.147                  | 9.496                    | 0.162                  | 10.566                   | 0.162                  | 9.209                    |
| 0.491                  | 10.743                   | 0.491                  | 8.923                    | 0.197                  | 10.573                   | 0.197                  | 8.963                    |
| 0.747                  | 10.941                   | 0.747                  | 8.951                    | 0.491                  | 10.440                   | 0.491                  | 9.066                    |
| 0.982                  | 11.029                   | 0.982                  | 9.018                    | 0.504                  | 10.399                   | 0.511                  | 9.119                    |
|                        |                          |                        |                          | 0.735                  | 10.307                   | 0.735                  | 8.971                    |
|                        |                          |                        |                          | 0.980                  | 10.262                   | 0.980                  | 8.878                    |
| $T = 310.15 \text{ K}$ |                          |                        |                          | $T = 318.15 \text{ K}$ |                          |                        |                          |
| 0.148                  | 9.989                    | 0.148                  | 8.376                    | 0.148                  | 9.519                    | 0.148                  | 8.144                    |
| 0.165                  | 9.988                    | 0.165                  | 8.690                    | 0.493                  | 9.136                    | 0.493                  | 8.257                    |
| 0.495                  | 9.904                    | 0.497                  | 8.470                    | 0.749                  | 9.213                    | 0.749                  | 8.307                    |
| 0.743                  | 9.978                    | 0.746                  | 8.514                    | 0.986                  | 8.798                    | 0.986                  | 8.312                    |
| 0.989                  | 10.002                   | 0.985                  | 8.513                    |                        |                          |                        |                          |

<sup>a)</sup> Refers to the general equilibrium  $\text{H}_{i-1}\text{L}^{(z+i-1)} + \text{H}^+ = \text{H}_i\text{L}^{-z+i}$

**Table S2.** Literature hydrolytic and chloride constants of  $\text{CH}_3\text{Hg}^+$ ,  $\text{Mg}^{2+}$ ,  $\text{Ca}^{2+}$  and  $\text{Sn}^{2+}$  ions in NaCl aqueous solutions at different ionic strengths and temperatures.

| Species                                         |                         | CH <sub>3</sub> Hg <sup>+</sup> |          |          |          |       |      |
|-------------------------------------------------|-------------------------|---------------------------------|----------|----------|----------|-------|------|
|                                                 |                         | T/K                             |          |          |          |       |      |
|                                                 | I/ mol dm <sup>-3</sup> | 288.15 K                        | 298.15 K | 310.15 K | 318.15 K |       |      |
| log β <sub>pr</sub>                             |                         |                                 |          |          |          |       |      |
| CH <sub>3</sub> HgOH <sup>0</sup>               | 0.15                    | -4.52                           | -4.54    | -4.50    | -4.50    |       |      |
|                                                 | 0.50                    | -4.48                           | -4.58    | -4.46    | -4.46    |       |      |
|                                                 | 0.75                    | -4.45                           | -4.64    | -4.44    | -4.43    |       |      |
|                                                 | 1.00                    | -4.42                           | -4.64    | -4.41    | -4.40    |       |      |
| CH <sub>3</sub> HgCl <sup>0</sup>               | 0.15                    | 5.33                            | 5.25     | 5.34     | 5.33     |       |      |
|                                                 | 0.50                    | 5.31                            | 5.16     | 5.31     | 5.30     |       |      |
|                                                 | 0.75                    | 5.32                            | 5.13     | 5.32     | 5.31     |       |      |
|                                                 | 1.00                    | 5.34                            | 5.13     | 5.34     | 5.33     |       |      |
| Species                                         |                         | Mg <sup>2+</sup>                |          |          |          |       |      |
| MgOH <sup>+</sup>                               | 0.15                    | -11.21                          | -11.22   | -11.22   |          |       |      |
|                                                 | 0.50                    | -11.22                          | -11.23   | -11.23   |          |       |      |
|                                                 | 0.75                    | -11.27                          | -11.28   | -11.28   |          |       |      |
|                                                 | 1.00                    | -11.33                          | -11.33   | -11.34   |          |       |      |
| Mg <sub>4</sub> (OH) <sub>4</sub> <sup>+</sup>  | 0.15                    | -37.46                          | -37.46   | -37.47   |          |       |      |
|                                                 | 0.50                    | -37.83                          | -37.85   | -37.88   |          |       |      |
|                                                 | 0.75                    | -37.97                          | -38.00   | -38.04   |          |       |      |
|                                                 | 1.00                    | -38.09                          | -38.13   | -38.18   |          |       |      |
| Species                                         |                         | Ca <sup>2+</sup>                |          |          |          |       |      |
| CaOH <sup>+</sup>                               | 0.15                    | -13.14                          | -12.98   | -12.56   |          |       |      |
|                                                 | 0.50                    |                                 | -12.98   |          |          |       |      |
|                                                 | 0.75                    |                                 | -12.98   |          |          |       |      |
|                                                 | 1.00                    |                                 | -12.97   |          |          |       |      |
| Species                                         |                         | Sn <sup>2+</sup>                |          |          |          |       |      |
| T/K                                             |                         | 288.15                          | 298.15   |          | 310.15   |       |      |
| I/mol dm <sup>-3</sup>                          |                         | 0.15                            | 0.15     | 0.50     | 0.75     | 1.00  | 0.15 |
| SnOH <sup>+</sup>                               | 3.96                    | -3.78                           | -3.91    | -3.96    | -4.00    | -3.56 |      |
| Sn(OH) <sub>2</sub> <sup>0</sup>                | 6.67                    | -6.53                           | -6.68    | -6.75    | -6.81    | -6.36 |      |
| Sn(OH) <sub>3</sub> <sup>-</sup>                | 6.53                    | -16.97                          | -17.05   | -17.1    | -17.15   | -17.5 |      |
| Sn <sub>2</sub> (OH) <sub>2</sub> <sup>2-</sup> | 5.36                    | -5.06                           | -5.2     | -5.26    | -5.32    | -4.7  |      |
| Sn <sub>3</sub> (OH) <sub>4</sub> <sup>2+</sup> | 7.00                    | -6.39                           | -6.63    | -6.72    | -6.8     | -5.66 |      |
| SnCl <sup>+</sup>                               | 0.7                     | 0.76                            | 0.58     | 0.52     | 0.49     | 0.77  |      |
| SnCl <sub>2</sub> <sup>0</sup> (aq)             | 1.44                    | 1.5                             | 1.23     | 1.15     | 1.09     | 1.76  |      |
| SnCl <sub>3</sub> <sup>-</sup>                  | 1.38                    | 1.46                            | 1.19     | 1.11     | 1.05     | 1.71  |      |
| SnCl(OH) <sup>0</sup> (aq)                      | 2.11                    | -2.07                           | -2.36    | -2.5     | -2.61    | -2.98 |      |

a) Refers to the general equilibrium:  $p \text{M}^{n+} + r \text{H}_2\text{O} = \text{M}_p(\text{OH})_r(\text{np}-r) + r \text{H}^+$

**Table S3** Formation constants of the  $\text{CH}_3\text{Hg}^+/\text{Dop}^-$  complexes at different ionic strengths and temperatures in molal concentration scale.

| $T/\text{K}$ | $I/\text{mol kg}^{-1}$ | $\log \beta_{\text{ML}}^{\text{a)}}$ | $\log \beta_{\text{MLOH}}^{\text{a)}}$ |
|--------------|------------------------|--------------------------------------|----------------------------------------|
| 288.15       | 0.000                  | 3.895                                | -5.291                                 |
| 288.15       | 0.151                  | 3.458                                | -6.278                                 |
| 288.15       | 0.505                  | 3.255                                | -6.676                                 |
| 288.15       | 0.760                  | 3.261                                | -6.905                                 |
| 288.15       | 1.019                  | 3.459                                | -7.336                                 |
| 298.15       | 0.000                  | 3.559                                | -5.366                                 |
| 298.15       | 0.151                  | 3.032                                | -6.111                                 |
| 298.15       | 0.506                  | 2.792                                | -6.531                                 |
| 298.15       | 0.763                  | 2.770                                | -6.825                                 |
| 298.15       | 1.022                  | 2.942                                | -7.324                                 |
| 310.15       | 0.000                  | 3.004                                | -4.796                                 |
| 310.15       | 0.151                  | 2.557                                | -5.926                                 |
| 310.15       | 0.508                  | 2.274                                | -6.369                                 |
| 310.15       | 0.766                  | 2.223                                | -6.736                                 |
| 310.15       | 1.027                  | 2.364                                | -7.311                                 |

a) Refers to the general equilibrium:  $p \text{M}^{n+} + q \text{L}^{z-} + r \text{H}^+ + \text{Cl}^- = \text{M}_p\text{L}_q\text{H}_r\text{Cl}^{(np-zq+r-1)}$

**Table S4** Formation constants of the  $\text{Ca}^{2+}/\text{Dop}^-$  complexes at different ionic strengths and temperatures in molal concentration scale.

| $T/\text{K}$ | $I/\text{mol Kg}^{-1}$ | $\log \beta_{\text{ML}}^{\text{a)}}$ | $\log \beta_{\text{MLH}}^{\text{a)}}$ | $\log \beta_{\text{MLOH}}^{\text{a)}}$ |
|--------------|------------------------|--------------------------------------|---------------------------------------|----------------------------------------|
| 288.15       | 0.150                  | -                                    | 13.60                                 | -6.97                                  |
| 298.15       | 0.145                  | 4.82                                 | 13.42                                 | -5.78                                  |
| 298.15       | 0.483                  | 3.64                                 | 13.26                                 | -7.78                                  |
| 298.15       | 0.714                  | 23.94                                | 13.62                                 | -6.69                                  |
| 298.15       | 0.972                  | 5.24                                 | 14.40                                 | -6.49                                  |
| 310.15       | 0.150                  | -                                    | 13.50                                 | -5.60                                  |

a) Refers to the general equilibrium:  $p \text{M}^{n+} + q \text{L}^{z-} + r \text{H}^+ = \text{M}_p\text{L}_q\text{H}_r^{(np-zq+r)}$

**Table S5** Formation constants of the  $\text{Mg}^{2+}/\text{Dop}^-$  complexes at different ionic strengths and temperatures in molal concentration scale.

| $T/\text{K}$ | $I/\text{mol Kg}^{-1}$ | $\log\beta_{\text{ML}}^{\text{a)}}$ | $\log\beta_{\text{MLOH}}^{\text{a)}}$ |
|--------------|------------------------|-------------------------------------|---------------------------------------|
| 288.15       | 0.000                  | 3.89                                | -5.29                                 |
| 288.15       | 0.151                  | 3.46                                | -6.28                                 |
| 288.15       | 0.505                  | 3.25                                | -6.68                                 |
| 288.15       | 0.760                  | 3.26                                | -6.91                                 |
| 288.15       | 1.019                  | 3.46                                | -7.34                                 |
| 298.15       | 0.000                  | 3.56                                | -5.37                                 |
| 298.15       | 0.151                  | 3.03                                | -6.11                                 |
| 298.15       | 0.506                  | 2.79                                | -6.53                                 |
| 298.15       | 0.763                  | 2.77                                | -6.83                                 |
| 298.15       | 1.022                  | 2.94                                | -7.32                                 |
| 310.15       | 0.000                  | 3.00                                | -4.80                                 |
| 310.15       | 0.151                  | 2.56                                | -5.93                                 |
| 310.15       | 0.508                  | 2.27                                | -6.37                                 |
| 310.15       | 0.766                  | 2.22                                | -6.74                                 |
| 310.15       | 1.027                  | 2.36                                | -7.31                                 |

a) Refers to the general equilibrium:  $p \text{M}^{n+} + q \text{L}^{z-} + r \text{H}^+ = \text{M}_p\text{L}_q\text{H}_r(\text{np}-\text{zq}+\text{r})$

**Table S6** Formation constants of the  $\text{Sn}^{2+}/\text{Dop}^-$  complexes at different ionic strengths and temperatures in molal concentration scale.

| $T/\text{K}$ | $I/\text{mol Kg}^{-1}$ | $\log\beta_{\text{M2L2}}^{\text{a)}}$ | $\log\beta_{\text{ML2}}^{\text{a)}}$ | $\log\beta_{\text{MLOH}}^{\text{a)}}$ | $\log\beta_{\text{M2LOH}}^{\text{a)}}$ |
|--------------|------------------------|---------------------------------------|--------------------------------------|---------------------------------------|----------------------------------------|
| 288.15       | 0.151                  | 35.20                                 | 24.50                                | 9.53                                  | 15.42                                  |
| 298.15       | 0.148                  | 34.82                                 | 24.11                                | 9.49                                  | 15.67                                  |
| 298.15       | 0.477                  | 34.33                                 | 23.09                                | 9.1                                   | 15.54                                  |
| 298.15       | 0.720                  | 33.93                                 | 22.50                                | 8.74                                  | 15.95                                  |
| 298.15       | 0.974                  | 31.65                                 | 20.73                                | 7.63                                  | 15.59                                  |
| 310.15       | 0.151                  | 32.53                                 | 20.88                                | 8.46                                  | 14.89                                  |

a) Refers to the general equilibrium:  $p \text{M}^{n+} + q \text{L}^{z-} + r \text{H}^+ = \text{M}_p\text{L}_q\text{H}_r(\text{np}-\text{zq}+\text{r})$

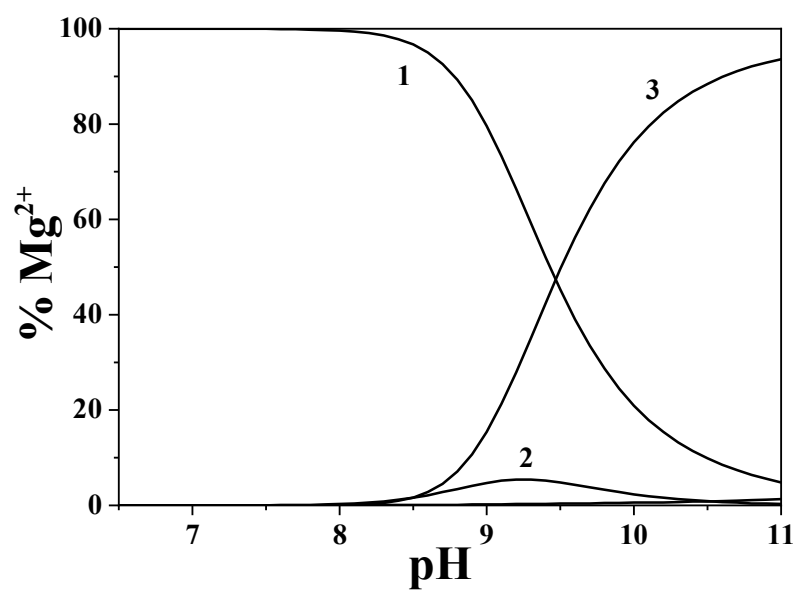

**Figure S1.** Distribution diagram for the  $\text{Mg}^{2+}/\text{Dop}^-$  species at  $I = 0.15 \text{ mol dm}^{-3}$  and  $T = 310.15 \text{ K}$ . Species: 1 M, 2 ML, 3 MLOH. (Experimental Conditions:  $c_{\text{Mg}^{2+}} = 1.0 \text{ mmol dm}^{-3}$ ;  $c_{\text{Dop}^-} = 1.0 \text{ mmol dm}^{-3}$ ) [ $M = \text{Mg}^{2+}$ ;  $L = \text{Dop}^-$ ].

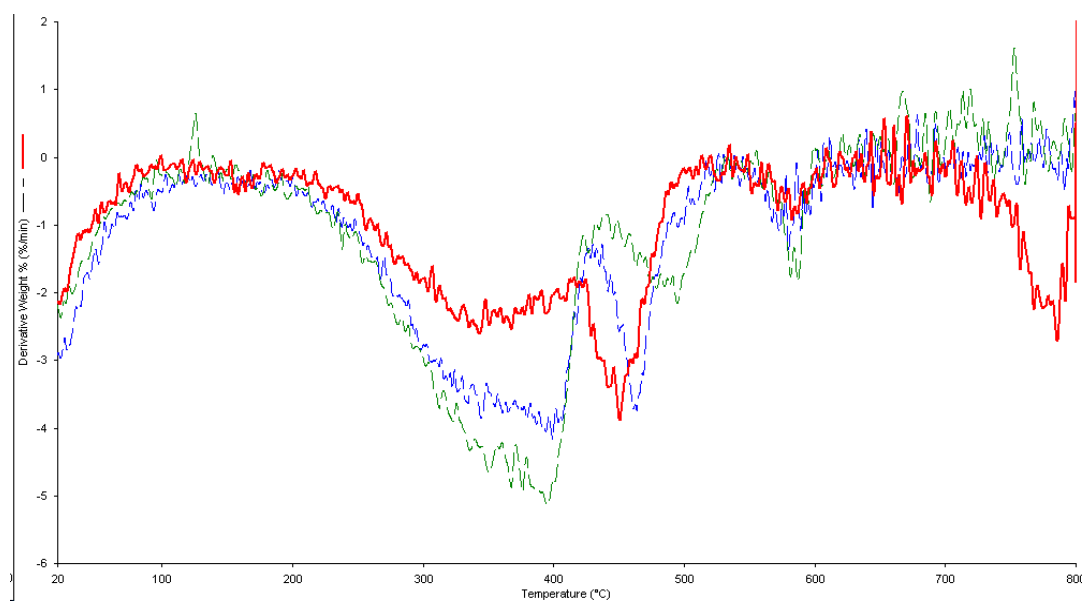

**Figure S2.** Derivative weight curves for the different  $\text{Ca}^{2+}/\text{Dop}^-$  precipitates.

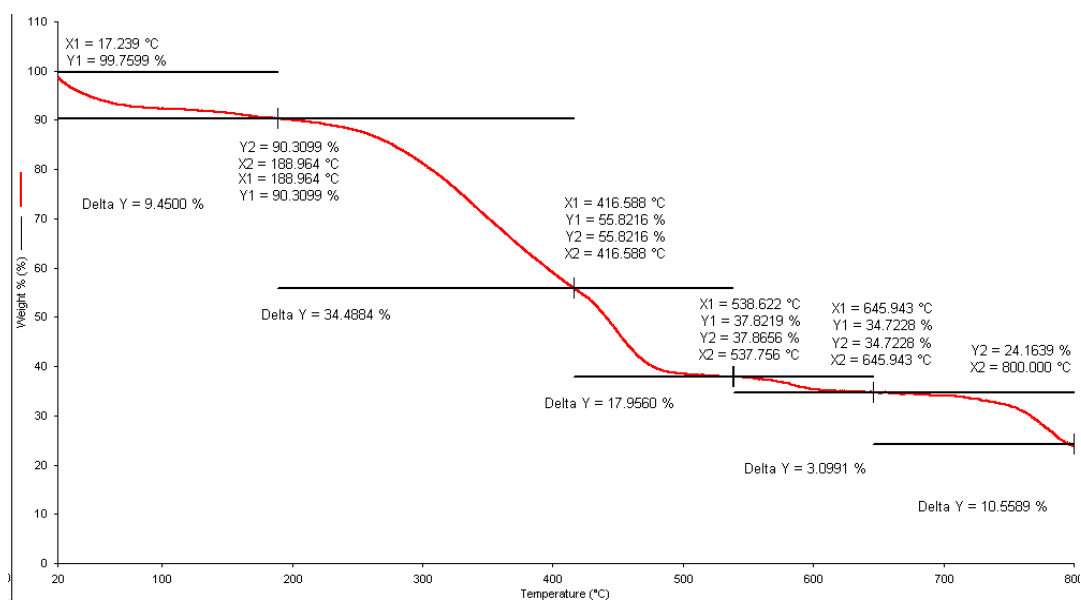

Figure S3. Thermogravimetric profile of the percentage weight loss for Ca<sup>2+</sup>/Dop- A.

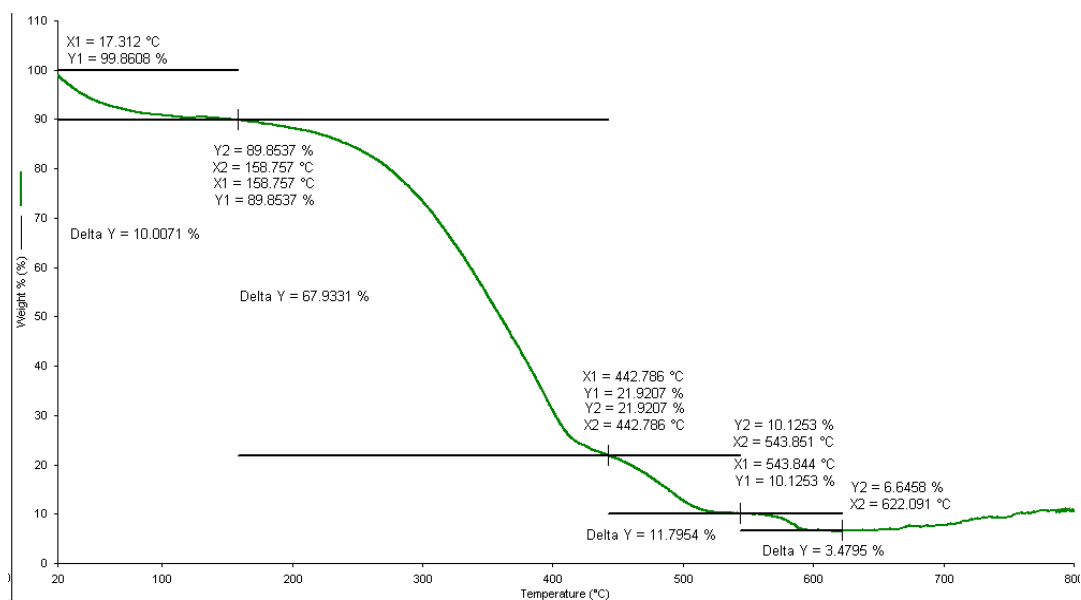

Figure S4. Thermogravimetric profile of the percentage weight loss for Ca<sup>2+</sup>/Dop- C.
